# Supplementary material for: Investigation of the photoisomerisation process in four p-benzoxazoyl-substituted stilbenes
Source: Royal Society of Chemistry journal article supplement (doi:10.1039/b9pp00098d), 2010-02-02
Supplement: b9pp00098d.pdf [file b9pp00098d.pdf]

| solvent           | Dielectric constant ( $\epsilon_s$ ) | $k_r/s^{-1}$       | Fluorescence lifetime/ns | Fluorescence quantum yield | $\Phi_{t-c}$   |
|-------------------|--------------------------------------|--------------------|--------------------------|----------------------------|----------------|
| HEX               | 1.89                                 | $1.02 \times 10^9$ | 0.93                     | 0.95                       | 0.065          |
| CHX               | 2.04                                 |                    | 0.81                     |                            | 0.076          |
| DBE               | 3.08                                 |                    | 0.73                     |                            | $0.1(0.43)^b$  |
| EtAc              | 6.08                                 | $1.01 \times 10^9$ | 0.76                     | 0.77                       | 0.16           |
| GTA               | 7.11                                 | $0.89 \times 10^9$ | 0.83                     | 0.74                       | 0.12           |
| THF               | 7.52                                 | $0.78 \times 10^9$ | 0.58                     | 0.83                       | 0.15           |
| MeCl <sub>2</sub> | 8.93                                 | $0.94 \times 10^9$ | 0.87                     | 0.82                       | 0.14           |
| Ace               | 21.0                                 | $0.78 \times 10^9$ | 0.69                     | 0.54                       | 0.16           |
| ACN               | 36.6                                 | $0.85 \times 10^9$ | 0.68                     | 0.58                       | $0.16(0.48)^b$ |
| DMF               | 38.25                                | $0.8 \times 10^9$  | 0.73                     | 0.59                       |                |
| DMSO              | 47.24                                | $0.91 \times 10^9$ | 0.75                     | 0.68                       | 0.13           |
| PC                | 66.14                                | $0.95 \times 10^9$ | 0.69                     | 0.66                       | 0.18           |

## II

| solvent           | Dielectric constant( $\epsilon_s$ ) | $k_r/s^{-1}$       | Fluorescence lifetime/ns | Fluorescence quantum yield | $\Phi_{t-c}$   |
|-------------------|-------------------------------------|--------------------|--------------------------|----------------------------|----------------|
| HEX               | 1.89                                | $0.93 \times 10^9$ | 0.80                     | 0.67                       | 0.21           |
| CHX               | 2.04                                | $0.86 \times 10^9$ | 0.71                     | 0.61                       | 0.23           |
| DBE               | 3.08                                | $0.51 \times 10^9$ | 0.73                     | 0.37                       | $0.26(0.07)^b$ |
| GTA               | 7.11                                |                    |                          |                            | 0.22           |
| THF               | 7.52                                | $0.44 \times 10^9$ | 0.58                     | 0.26                       | 0.36           |
| MeCl <sub>2</sub> | 8.93                                | $0.42 \times 10^9$ | 0.52                     | 0.22                       | 0.36           |
| Ace               | 21.0                                | $0.47 \times 10^9$ | 0.4                      | 0.19                       | 0.37           |
| ACN               | 36.6                                | $0.23 \times 10^9$ | 0.44                     | 0.1                        | $0.35(0.09)^b$ |
| DMF               | 38.25                               |                    |                          |                            |                |
| DMSO              | 47.24                               | $0.36 \times 10^9$ | 0.5                      | 0.18                       | 0.4            |
| PC                | 66.14                               | $0.26 \times 10^9$ | 0.5                      | 0.13                       | 0.4            |

### III

| solvent           | Dielectric constant( $\epsilon_s$ ) | $k_r/s^{-1}$       | Fluorescence lifetime/ns | Fluorescence quantum yield | $\Phi_{t-c}$   |
|-------------------|-------------------------------------|--------------------|--------------------------|----------------------------|----------------|
| HEX               | 1.89                                | $0.65 \times 10^9$ | 0.55                     | 0.36                       |                |
| DBE               | 3.08                                | $0.52 \times 10^9$ | 0.61                     | 0.32                       | $0.32(0.05)^b$ |
| EtAc              | 6.09                                | $0.43 \times 10^9$ | 0.98                     | 0.42                       | 0.32           |
| GTA               | 7.11                                | $0.36 \times 10^9$ | 1.47                     | 0.53                       | 0.22           |
| THF               | 7.52                                | $0.44 \times 10^9$ | 1.06                     | 0.47                       | $0.33(0.05)^b$ |
| MeCl <sub>2</sub> | 8.93                                | $0.4 \times 10^9$  | 1.07                     | 0.42                       | $0.31(0.05)^b$ |
| Ace               | 21.0                                | $0.37 \times 10^9$ | 1.42                     | 0.52                       | 0.26           |
| ACN               | 36.6                                | $0.32 \times 10^9$ | 1.61                     | 0.51                       | $0.14(0.27)^b$ |
| DMF               | 38.25                               | $0.41 \times 10^9$ | 1.64                     | 0.68                       | 0.18           |
| DMSO              | 47.24                               | $0.51 \times 10^9$ | 1.86                     | 0.95                       | 0.14           |
| PC                | 66.14                               | $0.37 \times 10^9$ | 1.85                     | 0.68                       |                |
| EtI               | 7.82                                | $0.57 \times 10^9$ | 0.87                     | 0.5                        |                |
| MeOH              | 33.0                                | $0.48 \times 10^9$ | 1.57                     | 0.75                       |                |
| EtOH              | 25.3                                | $0.47 \times 10^9$ | 1.55                     | 0.74                       |                |
| PrOH              | 20.8                                | $0.47 \times 10^9$ | 1.33                     | 0.63                       |                |
| BuOH              | 17.84                               | $0.39 \times 10^9$ | $1.29(0.042)^a$          | 0.5                        |                |
| PeOH              | 15.13                               | $0.42 \times 10^9$ | $1.24(0.066)^a$          | 0.52                       |                |
| HxOH              | 13.03                               | $0.43 \times 10^9$ | $1.21(0.095)^a$          | 0.52                       |                |
| HpOH              | 11.75                               | $0.36 \times 10^9$ | $1.18(0.129)^a$          | 0.42                       |                |
| OcOH              | 10.30                               |                    |                          | 0.41                       |                |

### IV

| solvent | Dielectric constant( $\epsilon_s$ ) | $k_r/s^{-1}$       | Fluorescence lifetime/ns | Fluorescence quantum yield | $\Phi_{t-c}$  |
|---------|-------------------------------------|--------------------|--------------------------|----------------------------|---------------|
| HEX     | 1.89                                | $0.48 \times 10^9$ | 1.33                     | 0.64                       | 0.13          |
| CHX     | 2.04                                | $0.48 \times 10^9$ | 1.28                     | 0.61                       | 0.1           |
| DBE     | 3.08                                | $0.47 \times 10^9$ | 1.48                     | 0.7                        | $0.14(0.4)^b$ |

|                   |       |                    |      |      |                |
|-------------------|-------|--------------------|------|------|----------------|
| GTA               | 7.11  | $0.35 \times 10^9$ | 2.0  | 0.7  | 0.03           |
| THF               | 7.52  | $0.4 \times 10^9$  | 1.83 | 0.73 | $0.1(0.4)^b$   |
| MeCl <sub>2</sub> | 8.93  | $0.39 \times 10^9$ | 1.9  | 0.74 | $0.09(0.3)^b$  |
| Ace               | 21.0  | $0.32 \times 10^9$ | 2.4  | 0.75 | 0.06           |
| ACN               | 36.6  | $0.31 \times 10^9$ | 2.55 | 0.78 | $0.05(0.24)^b$ |
| DMF               | 38.25 | $0.35 \times 10^9$ | 2.3  | 0.81 | 0.04           |
| DMSO              | 47.24 | $0.34 \times 10^9$ | 2.4  | 0.81 |                |
| PC                | 66.14 | $0.31 \times 10^9$ | 2.6  | 0.81 | 0.06           |

**Table 1.** Fluorescence lifetimes (error of estimation less than 2%) and fluorescence and isomerisation quantum yields (error of estimation less than 10%) of the investigated systems in solvents of different polarities. a) data in parantheses – short time component of the decay function of III in alcohols b) data in parantheses – quantum yields of cis-trans isomerisation calculated using eq. 3.

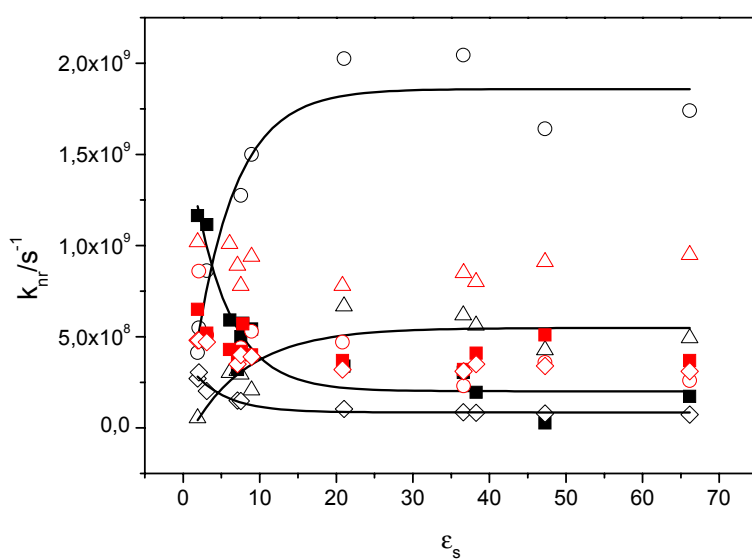

**Aux 1.** Solvent polarity dependence of nonradiative (black symbols) and radiative (red symbols) deactivation rate constants for I (triangles), II (circles), III (squared) and IV (diamonds).

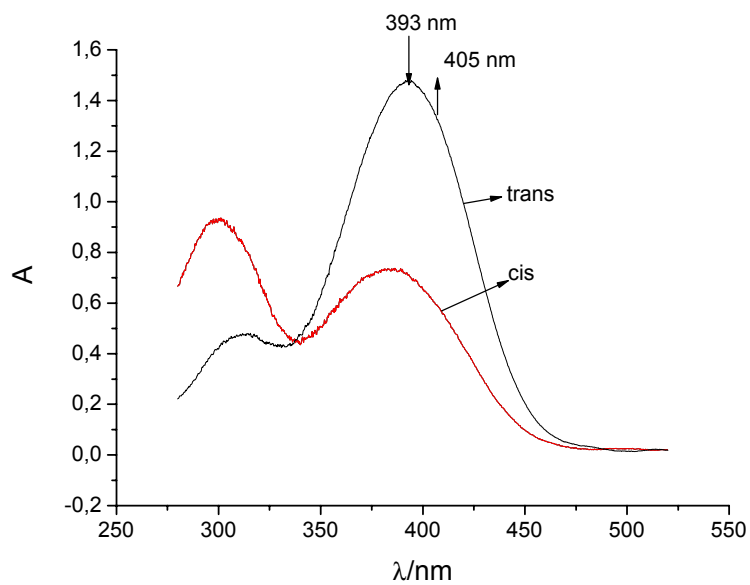

**Aux. 2.** Spectra of the trans and cis isomer of III in ACN (Fischer's analysis).

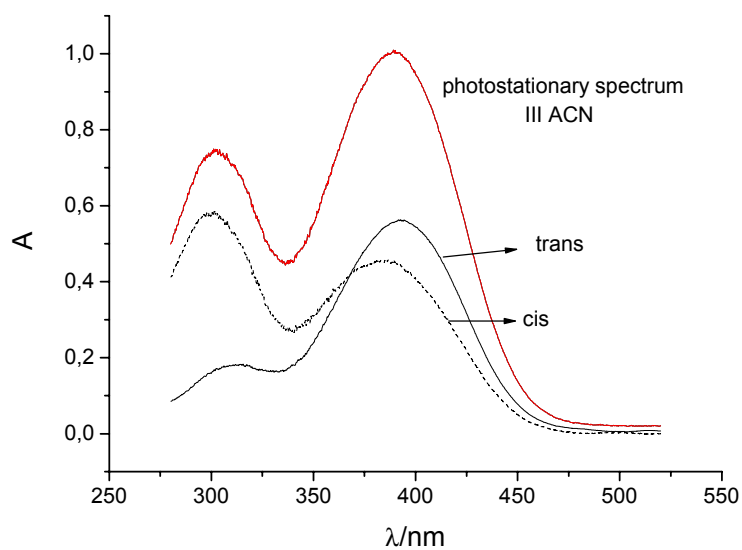

**Aux. 3.** Separation of the photostationary spectrum of III in acetonitrile (red line) into the trans and cis contributions.

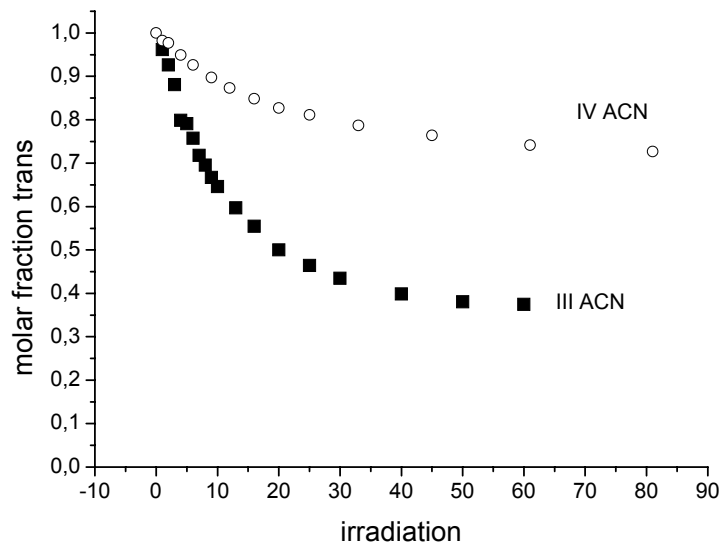

**Aux. 4.** Molar fraction of the trans isomer of III and IV in acetonitrile as a function of the irradiation time.
